# Supplementary material
Source: publisher figshare collection journal article supplement (https://brill.figshare.com/ndownloader/files/17866637)
Supplement: Supplementary file 1 [file 17866637]

**Extended methods.**

**Conditions for PCR and sequencing of *Hydromedusa maximiliani* RAG-1 sequence:**

Genomic DNA was extracted from muscle tissue of a specimen of *H. maximiliani* using phenol-chloroform protocol (Sambrook et al., 1989).

PCR amplification and sequencing were performed using the set of primers from Krenz et al. (2005) (see next table). The cycle conditions also were taken from Krenz et al. (2005) and produced three fragments of around 800 bp each.

Sequencing reaction was performed under standard procedures of Big Dye Terminator v.3.1 (Applied Biosystems, Inc.) and sequences were obtained with the Genetic Analyzer ABI 3130 (Applied Biosystems, Inc.). Sequence fragments were assembled with the software DNA Baser v.3 (Heracle BioSoft, Pitesti, Romania).

| **Primer** | **Sequence** |
| --- | --- |
| RAGF1 | CCWGAWGARATTCAGCAYCC |
| RAGR1 | GCAAGATCTCTTCATCRCATTC |
| RAGF2 | GAGATCATTYGAAAAGGCACC |
| RAGR2 | GATGTTCAGGAAGGATTTCACT |
| RAGF3 | AGAACCTGCATCCTRAAGTGC |
| RAGR3 | CTCAGGATGGCTGTCAGAGTC |
| RAGR4 | TGCAACACAGCTCTGAATTGG |
| RAGF5 | GAGATGTCAGYGAGAAGCATG |
| RAGR5 | GACATCCTCCATTTCATAGC |

**Analysis with PartitionFinder:**

This analysis requires as input a concatenated molecular matrix, and the user to indicate limits for each molecular marker. Also, the user must define other settings to obtain the “real” partition scheme of the treated matrix. The following lines shows the setting used in this paper to find the partition scheme of our concatenated molecular matrix:

## ALIGNMENT FILE ##

alignment = dna.phy;

user_tree_topology = user_tr.phy;

## BRANCHLENGTHS: linked | unlinked ##

branchlengths = linked;

## MODELS OF EVOLUTION for PartitionFinder: all | raxml | mrbayes | beast | <list> ##

models = all;

# MODEL SELECCTION: AIC | AICc | BIC #

model_selection = BIC;

## DATA BLOCKS ##[data_blocks]rRNA 12s = 1-441;

rRNA 16s = 442-974;

COI_codon1 = 975-1624\3;

COI_codon2 = 976-1624\3;

COI_codon3 = 977-1624\3;

ND4_codon1 = 1625-2414\3;

ND4_codon2 = 1626-2414\3;

ND4_codon3 = 1627-2414\3;

cytb_codon1 = 2415-3542\3;

cytb_codon2 = 2416-3542\3;

cytb_codon3 = 2417-3542\3;

Rag1_codon1 = 3543-6339\3;

Rag1_codon2 = 3544-6339\3;

Rag1_codon3 = 3545-6339\3;

cmos_codon1 = 6340-6704\3;

cmos_codon2 = 6341-6704\3;

cmos_codon3 = 6342-6704\3;

R35_codon1 = 6705-7815\3;

R35_codon2 = 6706-7815\3;

R35_codon3 = 6707-7815\3;

## SCHEMES, search: all | greedy | rcluster | hcluster | user ##

[schemes]

search = greedy;

**Modifications performed over the morphological matrix from de la Fuente et al. (2017b)**

**Taxa excluded:** *Chelydra serpentina* Linnaeus, 1758 and *Prochelidella portezuelae* de la Fuente, 2003.

**taxa added:** *Podocnemis expansa* Schweigger, 1812, *Erymnochelys madagascariensis* Grandidier 1867, *Prochelidella cerrobarcinae* de la Fuente et al., 2011, *Palaeophrynops patagonicus* Lapparent de Broin and de la Fuente, 2001, *Phrynops paranaensis* Wieland, 1923, *Birlimarr gaffneyi* Megirian and Murray, 1999, *Pseudemydura umbrina* Siebenrock 1901, *Elseya lavarackorum* White and Archer 1994, *Hydromedusa casamayorensis*, *Hydromedusa maximiliani*, *Chelodina alanrixi* Lapparent de Broin and Molnar, 2001, *Chelodina murrayi* Yates, 2013, *Chelodina expansa* Gray, 1857.

**Character modifications:** Character “Costo–vertebral tunnel”: the number of states for this character were reduced from 3 (states 0, 1 and 2) to 2 (states 0 and 1), since the difference between states 1 and 2 is difficult to score in extinct taxa. The states in the current matrix are (0) Well–developed through dorsal vertebrae series, (1) Developed narrowing toward posterior edge or slightly developed. Character “Axillary buttress shape” was split in two characters: Character “Axillary buttress shape”: (0) Anterior and posterior edges diverge towards lateral end, (1) Anterior and posterior edges are subparallel; Character “Medial constriction in axillary buttress”: (0) absent, (1) present. Character “Shape of cervical scute”: Three states were scored in the original matrix but only two were defined. The definition is the following: (0) wider than long; (1) squarish; (2) longer than wide. The order of the states in the character “Suprapygal posterior contact” was changed to be able of ordering: (0) pygal only; (1) pygal and peripheral 11; (2) pygal and peripherals 10 and 11. The following characters were taken as additive in the Maximum Parsimony (MP) analyses: “Inguinal buttresses extends over costals”, “Inguinal buttresses extends over peripherals”, “Shape of cervical scute”, “Gulars”. Added characters: “Shell ornamentation”: (0) smooth, (1) strong; “Position of cervical scute”: (0) in the anterior border of the carapace, (1) retracted behind the first pair of marginals, not located in the anterior border of the carapace.

**Data for the estimation of FBD model rates:**

The estimation of fossil sampling, birth and death rates require the information obtained from the fossil record. In order to perform analyses to estimate these rates, which later served as initial values of FBD parameters in the dating analyses, we compiled a list of pleurodiran fossils from the PaleoBiology Data Base (<https://paleobiodb.org>) and processed it to include only records assigned to species. The resulting list (presented in the PyRate format) is the following:

| Species | Status | MinT | MaxT |
| --- | --- | --- | --- |
| *Acanthochelys cosquinensis* | extinct | 2.588 | 5.333 |
| *Acleistochelys maliensis* | extinct | 56 | 66 |
| *Albertwoodemys testudinum* | extinct | 28.1 | 33.9 |
| *Albertwoodemys testudinum* | extinct | 15.97 | 20.44 |
| *Algorachelus parvus* | extinct | 93.5 | 99.6 |
| *Algorachelus parvus* | extinct | 93.5 | 99.6 |
| *Algorachelus peregrinus* | extinct | 93.5 | 99.6 |
| *Algorachelus peregrinus* | extinct | 93.5 | 99.6 |
| *Algorachelus tibert* | extinct | 93.9 | 100.5 |
| *Andrewsemys libyca* | extinct | 28.1 | 33.9 |
| *Andrewsemys libyca* | extinct | 33.9 | 38 |
| *Andrewsemys libyca* | extinct | 28.1 | 33.9 |
| *Apodichelys lucianoi* | extinct | 89.3 | 93.5 |
| *Araiochelys hirayamai* | extinct | 61.6 | 66 |
| *Araripemys barretoi* | extinct | 109 | 112.03 |
| *Araripemys barretoi* | extinct | 100.5 | 113 |
| *Araripemys barretoi* | extinct | 100.5 | 113 |
| *Araripemys barretoi* | extinct | 100.5 | 113 |
| *Araripemys barretoi* | extinct | 113 | 125 |
| *Arenila krebsi* | extinct | 66 | 72.1 |
| *Arenila krebsi* | extinct | 66 | 72.1 |
| *Atolchelys lepida* | extinct | 125 | 129.4 |
| *Azabbaremys moragjonesi* | extinct | 56 | 66 |
| *Bairdemys hartsteini* | extinct | 15.97 | 20.44 |
| *Bairdemys healeyorum* | extinct | 23.03 | 28.1 |
| *Bairdemys sanchezi* | extinct | 5.333 | 11.608 |
| *Bairdemys thalassica* | extinct | 11.608 | 15.97 |
| *Bairdemys venezuelensis* | extinct | 15.97 | 20.44 |
| *Bairdemys venezuelensis* | extinct | 5.333 | 11.608 |
| *Bairdemys venezuelensis* | extinct | 5.333 | 11.608 |
| *Bairdemys venezuelensis* | extinct | 5.333 | 11.608 |
| *Bairdemys winklerae* | extinct | 5.333 | 11.608 |
| *Bauruemys elegans* | extinct | 66 | 83.6 |
| *Birlimarr gaffneyi* | extinct | 11.608 | 15.97 |
| *Bonapartemys bajobarrealis* | extinct | 89.3 | 99.6 |
| *Bothremys arabicus* | extinct | 83.6 | 86.3 |
| *Bothremys cooki* | extinct | 66 | 72.1 |
| *Bothremys cooki* | extinct | 70.6 | 83.5 |
| *Bothremys cooki* | extinct | 72.1 | 83.6 |
| *Bothremys cooki* | extinct | 70.6 | 83.5 |
| *Bothremys kellyi* | extinct | 59.2 | 61.6 |
| *Bothremys maghrebiana* | extinct | 61.6 | 66 |
| *Bothremys maghrebiana* | extinct | 61.6 | 66 |
| *Brasilemys josai* | extinct | 109 | 112.03 |
| *Caninemys tridentata* | extinct | 5.333 | 11.608 |
| *Carbonemys cofrinii* | extinct | 58.7 | 61.7 |
| *Caririemys violetae* | extinct | 109 | 112.03 |
| *Carteremys leithi* | extinct | 66 | 72.1 |
| *Cearachelys placidoi* | extinct | 109 | 112.03 |
| *Cearachelys placidoi* | extinct | 100.5 | 113 |
| *Cerrejonemys wayuunaiki* | extinct | 58.7 | 61.7 |
| *Chedighaii barberi* | extinct | 70.6 | 83.5 |
| *Chedighaii barberi* | extinct | 72.1 | 83.6 |
| *Chedighaii barberi* | extinct | 70.6 | 83.5 |
| *Chedighaii barberi* | extinct | 72.1 | 83.6 |
| *Chedighaii barberi* | extinct | 72.1 | 83.6 |
| *Chedighaii barberi* | extinct | 72.1 | 83.6 |
| *Chedighaii barberi* | extinct | 72.1 | 83.6 |
| *Chedighaii hutchisoni* | extinct | 70.6 | 83.5 |
| *Chedighaii hutchisoni* | extinct | 70.6 | 83.5 |
| *Chedighaii hutchisoni* | extinct | 70.6 | 83.5 |
| *Chelodina alanrixi* | extinct | 41.3 | 66 |
| *Chelodina insculpta* | extinct | 2.588 | 5.333 |
| *Chelodina longicollis* | extant | 0 | 0.0117 |
| *Chelodina longicollis* | extant | 0.0117 | 2.588 |
| *Chelodina rugosa* | extant | 0 | 0.0117 |
| *Chelus colombianus* | extinct | 7.246 | 11.62 |
| *Chelus colombianus* | extinct | 7.246 | 11.62 |
| *Chelus colombianus* | extinct | 15.97 | 20.44 |
| *Chelus colombianus* | extinct | 11.608 | 15.97 |
| *Chelus colombianus* | extinct | 11.8 | 13.8 |
| *Chelus colombianus* | extinct | 23.03 | 33.9 |
| *Chelus colombianus* | extinct | 15.97 | 23.03 |
| *Chelus colombianus* | extinct | 5.333 | 11.608 |
| *Chelus colombianus* | extinct | 5.333 | 11.608 |
| *Chupacabrachelys complexus* | extinct | 70.6 | 83.5 |
| *Chupacabrachelys complexus* | extinct | 70.6 | 83.5 |
| *Cordichelys antiqua* | extinct | 33.9 | 38 |
| *Cordichelys antiqua* | extinct | 33.9 | 38 |
| *Crassachelys neurirregularis* | extinct | 47.8 | 56 |
| *Crassachelys neurirregularis* | extinct | 66 | 145 |
| *Dacquemys paleomorpha* | extinct | 28.1 | 33.9 |
| *Dacquemys paleomorpha* | extinct | 33.9 | 38 |
| *Dacquemys paleomorpha* | extinct | 28.1 | 33.9 |
| *Dirqadim schaefferi* | extinct | 93.5 | 105.3 |
| *Dirqadim schaefferi* | extinct | 93.9 | 100.5 |
| *Elochelys perfecta* | extinct | 72.1 | 83.6 |
| *Elseya latisternum* | extant | 0 | 0.0117 |
| *Elseya lavarackorum* | extant | 3.6 | 5.333 |
| *Elseya uberrima* | extinct | 0.0117 | 2.588 |
| *Eocenochelus eremberti* | extinct | 41.3 | 47.8 |
| *Eocenochelus eremberti* | extinct | 47.8 | 56 |
| *Eocenochelus eremberti* | extinct | 41.3 | 47.8 |
| *Eocenochelus farresi* | extinct | 33.9 | 38 |
| *Eocenochelus lacombianus* | extinct | 47.8 | 56 |
| *Eotaphrosphys ambiguum* | extinct | 66 | 72.1 |
| *Erymnochelys madagascariensis* | extant | 83.6 | 89.3 |
| *Euraxemys essweini* | extinct | 100.5 | 113 |
| *Foxemys mechinorum* | extinct | 70.6 | 83.5 |
| *Foxemys mechinorum* | extinct | 70.6 | 83.5 |
| *Foxemys mechinorum* | extinct | 70.6 | 83.5 |
| *Foxemys mechinorum* | extinct | 66 | 83.5 |
| *Foxemys mechinorum* | extinct | 66 | 83.5 |
| *Foxemys trabanti* | extinct | 83.6 | 86.3 |
| *Galianemys emringeri* | extinct | 93.5 | 99.6 |
| *Galianemys emringeri* | extinct | 93.9 | 100.5 |
| *Galianemys whitei* | extinct | 93.5 | 99.6 |
| *Galianemys whitei* | extinct | 93.9 | 100.5 |
| *Hamadachelys escuilliei* | extinct | 93.5 | 105.3 |
| *Hamadachelys escuilliei* | extinct | 93.9 | 100.5 |
| *Hydromedusa casamayorensis* | extinct | 61.6 | 66 |
| *Hydromedusa casamayorensis* | extinct | 37.2 | 48.6 |
| *Hydromedusa casamayorensis* | extinct | 37.2 | 48.6 |
| *Hydromedusa casamayorensis* | extinct | 37.2 | 48.6 |
| *Hydromedusa casamayorensis* | extinct | 37.2 | 48.6 |
| *Hydromedusa tectifera* | extant | 0.126 | 0.781 |
| *Hydromedusa tectifera* | extant | 4 | 6.8 |
| *Hydromedusa tectifera* | extant | 0.0117 | 0.126 |
| *Hydromedusa tectifera* | extant | 0.0117 | 2.588 |
| *Hydromedusa tectifera* | extant | 0.0117 | 2.588 |
| *Hydromedusa tectifera* | extant | 0.0117 | 2.588 |
| *Hydromedusa tectifera* | extant | 0.0117 | 2.588 |
| *Iberoccitanemys convenarum* | extinct | 66 | 83.5 |
| *Iberoccitanemys convenarum* | extinct | 66 | 83.5 |
| *Iberoccitanemys convenarum* | extinct | 66 | 70.6 |
| *Iberoccitanemys convenarum* | extinct | 70.6 | 83.5 |
| *Iberoccitanemys convenarum* | extinct | 70.6 | 83.5 |
| *Kenyemys williamsi* | extinct | 2.588 | 11.62 |
| *Kenyemys williamsi* | extinct | 2.588 | 7.246 |
| *Kinkonychelys rogersi* | extinct | 66 | 72.1 |
| *Kinkonychelys rogersi* | extinct | 66 | 72.1 |
| *Kinkonychelys rogersi* | extinct | 66 | 72.1 |
| *Kinkonychelys rogersi* | extinct | 66 | 72.1 |
| *Kinkonychelys rogersi* | extinct | 66 | 72.1 |
| *Kurmademys kallamedensis* | extinct | 66 | 70.6 |
| *Labrostochelys galkini* | extinct | 61.6 | 66 |
| *Labrostochelys galkini* | extinct | 61.6 | 66 |
| *Lapparentemys vilavilensis* | extinct | 61.6 | 66 |
| *Latentemys plowdeni* | extinct | 15.97 | 16.9 |
| *Lemurchelys diasphax* | extinct | 15.97 | 23.03 |
| *Linderochelys rinconensis* | extinct | 83.5 | 89.3 |
| *Lomalatachelys neuquina* | extinct | 83.6 | 86.3 |
| *Mendozachelys wichmanni* | extinct | 66 | 83.5 |
| *Mogharemys blanckenhorni* | extinct | 15.97 | 16.9 |
| *Motelomama olssoni* | extinct | 47.8 | 56 |
| *Neochelys arenarum* | extinct | 48.6 | 55.8 |
| *Neochelys capellinii* | extinct | 41.3 | 47.8 |
| *Neochelys eocaenica* | extinct | 48.6 | 55.8 |
| *Neochelys eocaenica* | extinct | 41.3 | 47.8 |
| *Neochelys eocaenica* | extinct | 41.3 | 47.8 |
| *Neochelys eocaenica* | extinct | 47.8 | 56 |
| *Neochelys eocaenica* | extinct | 47.8 | 56 |
| *Neochelys eocaenica* | extinct | 47.8 | 56 |
| *Neochelys eocaenica* | extinct | 48.6 | 55.8 |
| *Neochelys eocaenica* | extinct | 47.8 | 56 |
| *Neochelys eocaenica* | extinct | 47.8 | 56 |
| *Neochelys eocaenica* | extinct | 47.8 | 56 |
| *Neochelys eocaenica* | extinct | 47.8 | 56 |
| *Neochelys eocaenica* | extinct | 47.8 | 56 |
| *Neochelys eocaenica* | extinct | 47.8 | 56 |
| *Neochelys fajumensis* | extinct | 28.1 | 33.9 |
| *Neochelys fajumensis* | extinct | 23.03 | 33.9 |
| *Neochelys franzeni* | extinct | 40.4 | 48.6 |
| *Neochelys franzeni* | extinct | 40.4 | 48.6 |
| *Neochelys franzeni* | extinct | 40.4 | 48.6 |
| *Neochelys laurenti* | extinct | 47.8 | 56 |
| *Neochelys laurenti* | extinct | 47.8 | 56 |
| *Neochelys liriae* | extinct | 47.8 | 56 |
| *Neochelys liriae* | extinct | 47.8 | 56 |
| *Neochelys nicolisii* | extinct | 41.3 | 47.8 |
| *Neochelys salmanticensis* | extinct | 33.9 | 38 |
| *Neochelys salmanticensis* | extinct | 33.9 | 38 |
| *Neochelys salmanticensis* | extinct | 37.2 | 48.6 |
| *Neochelys salmanticensis* | extinct | 37.2 | 48.6 |
| *Neochelys salmanticensis* | extinct | 37.2 | 48.6 |
| *Neochelys salmanticensis* | extinct | 37.2 | 48.6 |
| *Neochelys salmanticensis* | extinct | 33.9 | 47.8 |
| *Neochelys salmanticensis* | extinct | 41.3 | 47.8 |
| *Neochelys salmanticensis* | extinct | 41.3 | 47.8 |
| *Neochelys salmanticensis* | extinct | 40.4 | 48.6 |
| *Neochelys salmanticensis* | extinct | 37.2 | 48.6 |
| *Neochelys salmanticensis* | extinct | 40.4 | 48.6 |
| *Neochelys salmanticensis* | extinct | 41.3 | 47.8 |
| *Neochelys salmanticensis* | extinct | 41.3 | 47.8 |
| *Neochelys salmanticensis* | extinct | 41.3 | 47.8 |
| *Neochelys zamorensis* | extinct | 41.3 | 47.8 |
| *Neochelys zamorensis* | extinct | 41.3 | 47.8 |
| *Nigeremys gigantea* | extinct | 66 | 72.1 |
| *Nigeremys gigantea* | extinct | 33.9 | 56 |
| *Nostimochelone lampra* | extinct | 15.97 | 23.03 |
| *Palaeophrynops patagonicus* | extinct | 66 | 83.6 |
| *Peiropemys mezzalirai* | extinct | 66 | 72.1 |
| *Pelusios rusingae* | extinct | 15.97 | 20.44 |
| *Phosphatochelys tedfordi* | extinct | 47.8 | 56 |
| *Phrynops geoffroanus* | extant | 6.8 | 9 |
| *Phrynops geoffroanus* | extant | 4 | 9 |
| *Phrynops paranaensis* | extinct | 6.8 | 9 |
| *Podocnemis argentinensis* | extinct | 55.8 | 61.7 |
| *Podocnemis argentinensis* | extinct | 55.8 | 58.7 |
| *Podocnemis argentinensis* | extinct | 55.8 | 58.7 |
| *Podocnemis argentinensis* | extinct | 23.03 | 33.9 |
| *Podocnemis bassleri* | extinct | 5.333 | 11.608 |
| *Podocnemis brasiliensis* | extinct | 61.6 | 66 |
| *Podocnemis brasiliensis* | extinct | 66 | 83.5 |
| *Podocnemis geologorum* | extinct | 16.3 | 17.5 |
| *Podocnemis harrisi* | extinct | 66 | 83.5 |
| *Podocnemis medemi* | extinct | 2.588 | 23.03 |
| *Podocnemis negrii* | extinct | 4 | 9 |
| *Podocnemis pritchardi* | extinct | 11.8 | 13.8 |
| *Podocnemis stromeri* | extinct | 33.9 | 38 |
| *Polysternon atlanticum* | extinct | 70.6 | 83.5 |
| *Polysternon atlanticum* | extinct | 70.6 | 83.5 |
| *Polysternon atlanticum* | extinct | 66 | 100.5 |
| *Polysternon provinciale* | extinct | 70.6 | 83.5 |
| *Polysternon provinciale* | extinct | 70.6 | 86.3 |
| *Polysternon provinciale* | extinct | 70.6 | 86.3 |
| *Polysternon provinciale* | extinct | 66 | 83.5 |
| *Polysternon provinciale* | extinct | 66 | 72.1 |
| *Polysternon provinciale* | extinct | 72.1 | 83.6 |
| *Portezueloemys patagonica* | extinct | 85.8 | 93.5 |
| *Pricemys caiera* | extinct | 66 | 72.1 |
| *Prochelidella argentinae* | extinct | 89.3 | 99.6 |
| *Prochelidella cerrobarcinae* | extinct | 100.5 | 125 |
| *Prochelidella portezuelae* | extinct | 85.8 | 93.5 |
| *Puentemys mushaisaensis* | extinct | 55.8 | 61.7 |
| *Puentemys mushaisaensis* | extinct | 55.8 | 61.7 |
| *Puentemys mushaisaensis* | extinct | 55.8 | 61.7 |
| *Puentemys mushaisaensis* | extinct | 58.7 | 61.7 |
| *Rhothonemys brinkmani* | extinct | 61.6 | 66 |
| *Rionegrochelys caldieroi* | extinct | 83.5 | 89.3 |
| *Rosasia soutoi* | extinct | 66 | 83.5 |
| *Roxochelys vilavilensis* | extinct | 48.6 | 58.7 |
| *Roxochelys vilavilensis* | extinct | 61.6 | 66 |
| *Roxochelys vilavilensis* | extinct | 61.6 | 66 |
| *Roxochelys vilavilensis* | extinct | 61.6 | 66 |
| *Roxochelys vilavilensis* | extinct | 61.6 | 66 |
| *Roxochelys wanderleyi* | extinct | 66 | 72.1 |
| *Roxochelys wanderleyi* | extinct | 66 | 72.1 |
| *Roxochelys wanderleyi* | extinct | 66 | 83.5 |
| *Roxochelys wanderleyi* | extinct | 66 | 83.5 |
| *Salamanchelys palaeocenica* | extinct | 61.6 | 66 |
| *Salamanchelys palaeocenica* | extinct | 61.7 | 66 |
| *Sankuchemys sethnai* | extinct | 66 | 70.6 |
| *Shweboemys pilgrimi* | extinct | 0.0117 | 23.03 |
| *Shweboemys pisdurensis* | extinct | 66 | 72.1 |
| *Sokatra antitra* | extinct | 66 | 72.1 |
| *Sokatra antitra* | extinct | 66 | 72.1 |
| *Sokatra antitra* | extinct | 66 | 72.1 |
| *Sokatra antitra* | extinct | 66 | 72.1 |
| *Stereogenys cromeri* | extinct | 33.9 | 38 |
| *Stupendemys geographicus* | extinct | 6.8 | 9 |
| *Stupendemys geographicus* | extinct | 6.8 | 9 |
| *Stupendemys geographicus* | extinct | 6.8 | 9 |
| *Stupendemys geographicus* | extinct | 6.8 | 9 |
| *Stupendemys souzai* | extinct | 5.333 | 11.608 |
| *Taphrosphys congolensis* | extinct | 59.2 | 61.6 |
| *Taphrosphys congolensis* | extinct | 59.2 | 61.6 |
| *Taphrosphys congolensis* | extinct | 59.2 | 61.6 |
| *Taphrosphys congolensis* | extinct | 59.2 | 61.6 |
| *Taphrosphys congolensis* | extinct | 59.2 | 61.6 |
| *Taphrosphys congolensis* | extinct | 59.2 | 61.6 |
| *Taphrosphys congolensis* | extinct | 59.2 | 61.6 |
| *Taphrosphys congolensis* | extinct | 59.2 | 61.6 |
| *Taphrosphys congolensis* | extinct | 59.2 | 61.6 |
| *Taphrosphys congolensis* | extinct | 59.2 | 61.6 |
| *Taphrosphys ippolitoi* | extinct | 61.6 | 66 |
| *Taphrosphys nodosus* | extinct | 66 | 70.6 |
| *Taphrosphys nodosus* | extinct | 66 | 72.1 |
| *Taphrosphys strenuus* | extinct | 66 | 70.6 |
| *Taphrosphys sulcatus* | extinct | 61.7 | 70.6 |
| *Taphrosphys sulcatus* | extinct | 56 | 66 |
| *Taphrosphys sulcatus* | extinct | 66 | 100.5 |
| *Taphrosphys sulcatus* | extinct | 66 | 70.6 |
| *Taphrosphys sulcatus* | extinct | 66 | 70.6 |
| *Taphrosphys sulcatus* | extinct | 66 | 70.6 |
| *Taphrosphys sulcatus* | extinct | 66 | 70.6 |
| *Taphrosphys sulcatus* | extinct | 66 | 70.6 |
| *Taphrosphys sulcatus* | extinct | 61.7 | 70.6 |
| *Taphrosphys sulcatus* | extinct | 66 | 70.6 |
| *Taphrosphys sulcatus* | extinct | 61.7 | 70.6 |
| *Taphrosphys sulcatus* | extinct | 66 | 70.6 |
| *Taphrosphys sulcatus* | extinct | 66 | 70.6 |
| *Taphrosphys sulcatus* | extinct | 66 | 70.6 |
| *Taquetochelys decorata* | extinct | 100.5 | 125 |
| *Taquetochelys decorata* | extinct | 112.03 | 122.46 |
| *Tartaruscola teodorii* | extinct | 47.8 | 56 |
| *Teneremys lapparenti* | extinct | 112.03 | 122.46 |
| *Turkanemys pattersoni* | extinct | 2.588 | 11.608 |
| *Turkanemys pattersoni* | extinct | 7.246 | 11.62 |
| *Turkanemys pattersoni* | extinct | 2.588 | 11.62 |
| *Turkanemys pattersoni* | extinct | 2.588 | 11.62 |
| *Turkanemys pattersoni* | extinct | 2.588 | 5.333 |
| *Ummulisani rutgersensis* | extinct | 47.8 | 56 |
| *Ummulisani rutgersensis* | extinct | 47.8 | 56 |
| *Yaminuechelys gasparinii* | extinct | 66 | 83.5 |
| *Yaminuechelys gasparinii* | extinct | 70.6 | 83.5 |
| *Yaminuechelys gasparinii* | extinct | 66 | 83.5 |
| *Yaminuechelys gasparinii* | extinct | 66 | 83.5 |
| *Yaminuechelys maior* | extinct | 61.7 | 66 |
| *Yaminuechelys maior* | extinct | 61.6 | 66 |
| *Yaminuechelys maior* | extinct | 61.6 | 66 |
| *Yaminuechelys maior* | extinct | 61.6 | 66 |
| *Yaminuechelys maior* | extinct | 70.6 | 83.5 |
| *Yaminuechelys maior* | extinct | 70.6 | 83.5 |
| *Yuraramirim montealtensis* | extinct | 66 | 83.5 |
| *Zolhafah bella* | extinct | 66 | 72.1 |

**Estimation of fossil sampling rate with *TRiPS* (Starrfelt and Liow, 2015):**

This analysis uses the occurrence counts per species from the fossil record and the time period for these observations, to estimate (by maximum likelihood) the fossil sampling rate, the sampling probability and the species richness. All these results are presented with its associated 95% CI. The source codes to run this analysis are available from the repository indicated on the paper (<https://datadryad.org/resource/doi:10.5061/dryad.86922/1>). Once downloaded the needed files and prepared the named list of fossils, we ran the following source code in R to obtain our results:

data <- read.table("Path_to/fossils_list_file", sep= "\t", head=T) #load fossil occurrence data

sps_ocurrences <- as.integer(table(data$ Species)) #obtain ocurrences

library(stats4) # load necessary package

source("Path_to/functions_DinoBino_toweb.R") #load source code with TRiPS functions

dt <- (max(data$ MaxT)-min(data$ MinT)) #calculate time period

Out = doTRiPS_abs(sps_ocurrences,t=dt) #do the analysis

Out #show results

**Estimation of birth and death rates with *PyRate* (Silvestro et al., 2014):**

This program may be used to estimate birth and death rates through time, drawn from occurrence of fossil and extant data, by using an ad hoc MCMC algorithm. After downloading the necessary source codes (<https://sourceforge.net/projects/pyrate/>) we ran the analysis using the fossil occurrence data showed in the above table and the number of extant pleurodiran species according with the Turtle Taxonomy Working Group (2017). The complete procedure and setting used is detailed as follows:

source(file = “/path_to_file/pyrate_utilities.r”) #load the R source code with initial functions

extract.ages(file= ”/path_to_file/ Ocurr_Pleurodira_filtered.txt”) #resample ages from the fossil occurrence file and export the result to a Python file

python PyRate.py Ocurr_Pleurodira_filtered_PyRate.py -N 93 -mG -n 100000000 -s 5000 -p 5000 #run the analysis to estimate birth and death rates under the indicated parameters

-N = number of extant species

-mG = preservation rate is assumed to be gamma distributed

-n = number of generations in the MCMC chain

-s = sample frequency in the MCMC chain

-p = frequency of computation print

The results of this analysis are two “log” files, to explore the results in rate-through-time plots, an R source code was generated by typing:

python PyRate.py -mProb/path_to_file/ Ocurr_Pleurodira_filtered_1_G_mcmc.log

After running the R code the following output was obtained:


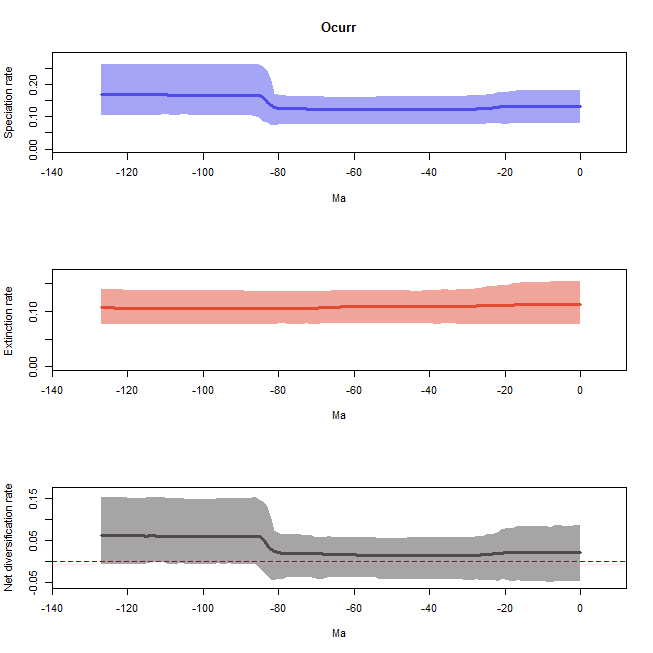


**Estimation of FBD model parameters for dating analysis:**

The previously estimated rates (with TRiPS and PyRate) were used to calculate initial values and limits of prior distributions in the rates required for the FBD (and the BD) model for the dating analyses (i.e. the priors setting using BEAUti). Although the parameters of the FBD model are birth rate, death rate, probability of sample extant species, and fossil sampling rate, some of the priors required by BEAST2 are derived from these, and are defined as:

Net diversification rate = Birth rate – Death rate

TurnOver = Death rate/Birth rate

Sampling proportion = Sampling rate/(Sampling rate + Death rate)

The mean, minimum and maximum values (from the 95% CI) of the rates estimated with TRiPS and PyRate, were used to calculate mean values of these parameters and define limits of uniform prior distribution. These values were entered as BEAUti settings for the BEAST2 *xml* file (*xml* files are supplied as supplementary materials). In example, the BEAUti setting for the FBD model parameters in the TE TD analysis is the following:

| **Net diversification rate** | | | **Turnover** | | | **Sampling proportion** | | |
| --- | --- | --- | --- | --- | --- | --- | --- | --- |
| **Min** | **Max** | **Mean** | **Min** | **Max** | **Mean** | **Min** | **Max** | **Mean** |
| -0.05 | 0.153 | 0.05 | 0.584 | 1.05 | 0.82 | 0.036 | 0.077 | 0.056 |

**References**

Sambrook J., Fritsch E.F. and Maniatis T. (1989) Molecular cloning: a laboratory manual, 2nd edition. New York, NY: Cold Spring Harbor Laboratory Press.

Krenz, J. G., Naylor, G. J., Shaffer, H. B., & Janzen, F. J. (2005). Molecular phylogenetics and evolution of turtles. Molecular phylogenetics and Evolution, 37(1), 178-191.
